# Supplementary material
Source: publisher figshare collection journal article supplement (https://gsajournals.figshare.com/ndownloader/files/25027145)
Supplement: Supplementary file 1 [file 25027145]

## Sheet: TableS1
TableS1. Features of the preliminary assemblies of P. pulmonarius ss2 and ss5 obtained with Canu, Falcon, Sourmash (decontamination) and Quiver (polishing).
	Features	Canu	Canu + Soursmash	Canu + Soursmash + Quiver	Falcon	Falcon + Soursmash	Falcon + Soursmash + Quiver
Pleurotus pulmonarius ss2	Total nt	40950889	40774743	40778513	40527552	40383578	40430866
	Scaffolds	54	50	50	39	34	34
	ACGT nt	40950889	40774743		40527552	40383578	40430866
	% GC	50.93	50.98	50.99	50.93	50.97	51.01
	Scaffold N50 nt	3012406	3012406	3012621	2238199	2638868	2641788
	Scaffold N90 nt	974086	974086	974184	939585	939585	940770
	Scaf. max. nt	5139728	5139728	5140519	5135074	5135074	5140517
	Scaf. min. nt	2843	2843	2841	10574	10574	10862
Pleurotus pulmonarius ss5	Total nt	40631668	40449693	40450376	39969076	39945311	39961457
	Scaffolds	59	55	55	30	29	29
	ACGT nt	40631668	40449693	40450376	39969076	39945311	39961457
	% GC	50.94	50.97	50.97	51.04	51.04	51.05
	Scaffold N50 nt	3030066	3030066	3028859	3100931	3100931	3102052
	Scaffold N90 nt	773592	773592	773543	866022	866022	866283
	Scaf. max. nt	5063046	5063046	5063242	5061483	5061483	5063380
	Scaf. min. nt	1546	1546	1549	14558	14558	14587

## Sheet: TableS2
TableS2. Features of the merged assemblies of P. pulmonarius ss2 and ss5 constructed with Quickmerge using the Canu assembly as reference and the Falcon assembly as donor (Canu-Falcon) and vice versa (Falcon-Canu).
Features	Canu-Falcon ss2	Falcon-Canu ss2	Canu-Falcon ss5	Falcon-Canu ss5
Total nt	39278914	37937549	39888833	42784520
Scaffolds	25	42	24	43
ACGT nt	39278914	37937549	39888833	42784520
% GC	50.98	51	51.04	50.98
Scaffold N50 nt	3175356	3012621	3374720	4137460
Scaffold N90 nt	1418296	1418296	1759240	1759240
Scaf. max. nt	5554685	5140519	5063380	5168621
Scaf. min. nt	10862	2841	21250	1549

## Sheet: TableS3
Table S3. Detected TE elements in P. pulmonarius ss2.
Element	Classification	Size	Fragments	Repeats	Total Bp
ss2_TE_1	DNA/TcMar-Tc1	984	1	1	984
ss2_TE_2	DNA/TcMar-Tc1	972	2	2	1594
ss2_TE_3	DNA/CMC-EnSpm	1692	3	1	1692
ss2_TE_4	DNA/CMC-EnSpm	1119	9	3	2311
ss2_TE_5	DNA/CMC-EnSpm	612	1	1	612
ss2_TE_6	DNA/CMC-EnSpm	1692	4	1	1692
ss2_TE_7	DNA/CMC-EnSpm	407	6	6	2418
ss2_TE_8	DNA/CMC-EnSpm	573	2	0	0
ss2_TE_9	DNA/CMC-EnSpm	2393	23	10	15721
ss2_TE_10	DNA/CMC-EnSpm	609	2	2	1218
ss2_TE_11	DNA/CMC-EnSpm	837	2	2	1674
ss2_TE_12	DNA/CMC-EnSpm	420	1	1	420
ss2_TE_13	DNA/CMC-EnSpm	908	22	16	5157
ss2_TE_14	DNA/CMC-EnSpm	903	3	1	902
ss2_TE_15	DNA/CMC-EnSpm	1289	13	10	8327
ss2_TE_16	DNA/CMC-EnSpm	1119	1	1	1117
ss2_TE_17	DNA/CMC-EnSpm	1692	3	1	892
ss2_TE_18	DNA/CMC-EnSpm	882	1	1	882
ss2_TE_19	DNA/CMC-EnSpm	666	5	5	3330
ss2_TE_20	DNA/CMC-EnSpm	8078	19	8	33608
ss2_TE_21	DNA/CMC-EnSpm	900	3	3	2700
ss2_TE_22	DNA/CMC-EnSpm	441	19	9	3576
ss2_TE_23	DNA/RC	870	7	7	6090
ss2_TE_24	DNA/RC	1233	4	4	2632
ss2_TE_25	DNA/RC	4155	1	0	0
ss2_TE_26	DNA/RC	4248	3	1	4248
ss2_TE_27	DNA/RC	4164	2	2	8328
ss2_TE_28	DNA/RC	4155	1	1	4152
ss2_TE_29	DNA/RC	3943	2	1	3943
ss2_TE_30	DNA/RC	634	5	3	1080
ss2_TE_31	DNA/RC	1713	1	1	1713
ss2_TE_32	DNA/RC	1527	1	1	1527
ss2_TE_33	DNA/RC	1477	6	6	8862
ss2_TE_34	DNA/RC	1533	4	3	4599
ss2_TE_35	DNA/RC	1551	1	1	1551
ss2_TE_36	DNA/RC	1437	1	1	1437
ss2_TE_37	DNA/RC	720	3	1	720
ss2_TE_38	DNA/RC	1492	1	1	1492
ss2_TE_39	DNA/RC	1461	1	1	1461
ss2_TE_40	DNA/RC	4179	2	2	4846
ss2_TE_41	DNA/RC	906	5	3	2718
ss2_TE_42	DNA/RC	4318	31	15	6239
ss2_TE_43	DNA/RC	4155	1	1	4155
ss2_TE_44	DNA/RC	4236	6	1	4236
ss2_TE_45	DNA/RC	1437	1	1	1437
ss2_TE_46	DNA/RC	1491	5	1	1491
ss2_TE_47	DNA/TcMar-Fot1	894	2	1	894
ss2_TE_48	DNA/TcMar-Fot1	1286	1	1	1286
ss2_TE_49	DNA/TcMar-Fot1	1722	1	1	1706
ss2_TE_50	DNA/TcMar-Fot1	1342	1	1	1342
ss2_TE_51	DNA/TcMar-Fot1	1722	3	1	1722
ss2_TE_52	DNA/TcMar-Fot1	1316	1	1	1316
ss2_TE_53	DNA/TcMar-Fot1	1732	1	1	1732
ss2_TE_54	DNA/TcMar-Ant1	1016	1	1	835
ss2_TE_55	DNA/TcMar-Ant1	1016	4	2	2032
ss2_TE_56	DNA/TcMar-Ant1	916	1	1	916
ss2_TE_57	DNA/TcMar-Ant1	1016	1	0	0
ss2_TE_58	DNA/TcMar-Ant1	657	1	1	657
ss2_TE_59	DNA/TcMar-Ant1	573	2	1	573
ss2_TE_60	DNA/TcMar-Ant1	860	1	1	860
ss2_TE_61	DNA/hAT-Ac	768	3	3	2304
ss2_TE_62	DNA/hAT-Ac	606	2	2	1212
ss2_TE_63	DNA/hAT-Ac	1737	1	1	1737
ss2_TE_64	DNA/hAT-Ac	1371	4	1	1371
ss2_TE_65	DNA/MULE-MuDR	718	10	2	634
ss2_TE_66	DNA/MULE-MuDR	3878	67	15	40649
ss2_TE_67	DNA	1647	3	1	1647
ss2_TE_68	DNA	1821	2	2	3642
ss2_TE_69	DNA/PIF-Harbinger	1705	19	9	8138
ss2_TE_70	DNA/MuLE-MuDR	537	1	1	537
ss2_TE_71	DNA/TcMar-Pogo	744	1	1	744
ss2_TE_72	DNA/TcMar-Pogo	540	1	1	540
ss2_TE_73	DNA/Crypton	6272	5	4	25088
ss2_TE_74	DNA/Maverick	5530	152	52	41933
ss2_TE_75	LINE/Tad1	2756	1	1	3595
ss2_TE_76	LINE/Tad1	2403	1	1	3595
ss2_TE_77	LINE/Tad1	1020	2	2	2040
ss2_TE_78	LINE/Tad1	2756	1	0	0
ss2_TE_79	LINE/Tad1	3396	2	2	6792
ss2_TE_80	LINE/Tad1	3702	3	1	3702
ss2_TE_81	LINE/Tad1	4261	30	23	17603
ss2_TE_82	LINE/Tad1	1341	1	1	1341
ss2_TE_83	LINE/Tad1	3666	5	4	13407
ss2_TE_84	LINE/Tad1	2403	2	2	4713
ss2_TE_85	LINE/L1	1567	99	3	3320
ss2_TE_86	LINE/L1	4209	8	2	8345
ss2_TE_87	LINE/R1	2539	64	41	21126
ss2_TE_88	LINE/L1-Tx1	2451	3	1	2451
ss2_TE_89	LINE/L2	13558	157	102	651829
ss2_TE_90	LINE/I	414	1	1	414
ss2_TE_91	LINE	834	5	1	834
ss2_TE_92	LTR/Copia	5898	14	12	32796
ss2_TE_93	LTR/Copia	834	1	1	834
ss2_TE_94	LTR/Copia	6596	2	2	10444
ss2_TE_95	LTR/Copia	5893	9	9	17789
ss2_TE_96	LTR/Copia	5775	15	13	22042
ss2_TE_97	LTR/Copia	3270	1	1	657
ss2_TE_98	LTR/Copia	6152	5	5	7086
ss2_TE_99	LTR/Copia	5891	12	11	15697
ss2_TE_100	LTR/Copia	5854	6	6	9990
ss2_TE_101	LTR/Copia	14730	88	25	54212
ss2_TE_102	LTR/Copia	3846	1	1	3846
ss2_TE_103	LTR/Copia	5900	19	15	53365
ss2_TE_104	LTR/Copia	3270	5	2	3479
ss2_TE_105	LTR/Copia	1534	1	1	1534
ss2_TE_106	LTR/Copia	6614	1	1	6614
ss2_TE_107	LTR/Copia	5032	2	2	10064
ss2_TE_108	LTR/Copia	1426	5	5	2271
ss2_TE_109	LTR/Copia	6413	9	9	12275
ss2_TE_110	LTR/Copia	2493	1	1	357
ss2_TE_111	LTR/Copia	6600	3	2	9356
ss2_TE_112	LTR/Copia	5488	26	9	24491
ss2_TE_113	LTR/Copia	444	1	1	444
ss2_TE_114	LTR	543	16	16	5979
ss2_TE_115	LTR/Ngaro	4603	3	1	3136
ss2_TE_116	LTR/Ngaro	4619	5	4	9587
ss2_TE_117	LTR/Ngaro	2685	1	1	2685
ss2_TE_118	LTR/Ngaro	4635	4	3	10169
ss2_TE_119	LTR/Ngaro	4578	2	2	4746
ss2_TE_120	LTR/Ngaro	4770	17	2	5022
ss2_TE_121	LTR/Ngaro	5030	5	1	5030
ss2_TE_122	LTR/Ngaro	4603	4	2	4772
ss2_TE_123	LTR/Ngaro	4781	28	8	14521
ss2_TE_124	LTR/Ngaro	4608	4	3	4953
ss2_TE_125	LTR/Ngaro	13708	55	6	22583
ss2_TE_126	LTR/Gypsy	10379	2	1	10379
ss2_TE_127	LTR/Gypsy	8281	9	1	8281
ss2_TE_128	LTR/Gypsy	4864	2	1	4864
ss2_TE_129	LTR/Gypsy	6698	3	3	7812
ss2_TE_130	LTR/Gypsy	6707	1	1	6707
ss2_TE_131	LTR/Gypsy	5688	1	1	3276
ss2_TE_132	LTR/Gypsy	7918	37	7	17561
ss2_TE_133	LTR/Gypsy	5654	4	3	15882
ss2_TE_134	LTR/Gypsy	510	1	1	510
ss2_TE_135	LTR/Gypsy	9909	1	1	9909
ss2_TE_136	LTR/Gypsy	6704	4	4	8109
ss2_TE_137	LTR/Gypsy	8281	1	1	5451
ss2_TE_138	LTR/Gypsy	6704	3	3	12703
ss2_TE_139	LTR/Gypsy	2001	2	2	4281
ss2_TE_140	LTR/Gypsy	4714	67	28	52306
ss2_TE_141	LTR/Gypsy	1737	34	11	10445
ss2_TE_142	LTR/Gypsy	2453	1	0	0
ss2_TE_143	LTR/Gypsy	10333	10	5	10993
ss2_TE_144	LTR/Gypsy	6694	1	1	6694
ss2_TE_145	LTR/Gypsy	9887	1	1	9887
ss2_TE_146	LTR/Gypsy	7983	10	9	15234
ss2_TE_147	LTR/Gypsy	6690	2	1	6690
ss2_TE_148	LTR/Gypsy	7956	15	9	18841
ss2_TE_149	LTR/Gypsy	6700	2	1	6700
ss2_TE_150	LTR/Gypsy	8826	1	1	8826
ss2_TE_151	LTR/Gypsy	2613	20	19	17751
ss2_TE_152	LTR/Gypsy	6715	1	1	6715
ss2_TE_153	LTR/Gypsy	6709	3	3	7906
ss2_TE_154	LTR/Gypsy	9428	22	16	33648
ss2_TE_155	LTR/Gypsy	6691	2	1	6691
ss2_TE_156	LTR/Gypsy	6683	1	1	6683
ss2_TE_157	LTR/Gypsy	6711	1	1	6711
ss2_TE_158	LTR/Gypsy	6711	2	1	6711
ss2_TE_159	LTR/Gypsy	6709	2	2	6828
ss2_TE_160	LTR/Gypsy	6674	1	1	6674
ss2_TE_161	LTR/Gypsy	3270	6	6	1339
ss2_TE_162	LTR/Gypsy	6709	2	2	7314
ss2_TE_163	LTR/Gypsy	6699	3	3	16468
ss2_TE_164	LTR/Gypsy	14332	20	18	27882
ss2_TE_165	LTR/Gypsy	13930	13	5	33719
ss2_TE_166	LTR/Gypsy	10267	2	2	10860
ss2_TE_167	LTR/Gypsy	688	9	7	981
ss2_TE_168	LTR/Gypsy	5654	4	2	5829
ss2_TE_169	LTR/Gypsy	2830	6	5	8240
ss2_TE_170	LTR/Gypsy	6719	2	2	11256
ss2_TE_171	LTR/Gypsy	4369	6	3	4605
ss2_TE_172	LTR/Gypsy	7300	3	3	11489
ss2_TE_173	LTR/Gypsy	6756	42	5	32783
ss2_TE_174	LTR/Gypsy	8331	1	1	8331
ss2_TE_175	LTR/Gypsy	6115	4	4	7955
ss2_TE_176	LTR/Gypsy	4912	27	6	10533
ss2_TE_177	LTR/Gypsy	1194	5	4	4524
ss2_TE_178	LTR/Gypsy	8007	1	1	8007
ss2_TE_179	LTR/Gypsy	6708	1	1	6708
ss2_TE_180	LTR/Gypsy	5668	5	4	11651
ss2_TE_181	LTR/Gypsy	2685	2	2	5370
ss2_TE_182	LTR/Gypsy	6440	3	3	1815
ss2_TE_183	LTR/Gypsy	6690	2	2	13380
ss2_TE_184	LTR/Gypsy	8826	1	1	7450
ss2_TE_185	LTR/Gypsy	6698	5	5	8697
ss2_TE_186	LTR/Gypsy	6709	1	1	6709
ss2_TE_187	LTR/Gypsy	5661	4	2	5855
ss2_TE_188	LTR/Gypsy	8335	1	1	8335
ss2_TE_189	LTR/Gypsy	7997	3	2	8399
ss2_TE_190	LTR/Gypsy	6684	2	2	6830
ss2_TE_191	LTR/Gypsy	9953	4	2	10284
ss2_TE_192	LTR/Gypsy	1447	9	5	6477
ss2_TE_193	LTR/Gypsy	8335	4	2	8587
ss2_TE_194	LTR/Gypsy	9944	9	3	10772
ss2_TE_195	LTR/Gypsy	6688	1	1	6688
ss2_TE_196	LTR/Gypsy	7972	10	6	7823
ss2_TE_197	LTR/Gypsy	2777	2	1	2777
ss2_TE_198	LTR/Gypsy	6691	3	3	7389
ss2_TE_199	LTR/Gypsy	6710	2	2	12158
ss2_TE_200	LTR/Gypsy	8281	3	1	7817
ss2_TE_201	LTR/Gypsy	6683	3	3	12922
ss2_TE_202	LTR/Gypsy	9263	12	9	14337
ss2_TE_203	LTR/Gypsy	11495	6	2	11750
ss2_TE_204	LTR/Gypsy	5950	18	13	13043
ss2_TE_205	LTR/Gypsy	3060	63	55	40868
ss2_TE_206	LTR/Gypsy	14935	28	3	17603
ss2_TE_207	LTR/Gypsy	6711	2	2	13422
ss2_TE_208	LTR/Gypsy	6326	1	1	5127
ss2_TE_209	LTR/Gypsy	9795	1	1	9795
ss2_TE_210	LTR/Gypsy	1982	1	1	1982
ss2_TE_211	LTR/Gypsy	9931	1	1	9931
ss2_TE_212	LTR/Gypsy	3288	2	1	1637
ss2_TE_213	LTR/Gypsy	6697	2	2	7293
ss2_TE_214	LTR/Gypsy	7759	4	3	8517
ss2_TE_215	LTR/Gypsy	5531	3	2	5706
ss2_TE_216	LTR/Gypsy	8004	3	1	8004
ss2_TE_217	LTR/Gypsy	6683	1	1	6683
ss2_TE_218	LTR/Gypsy	6706	5	4	16164
ss2_TE_219	LTR/Gypsy	792	1	1	792
ss2_TE_220	LTR/Gypsy	6710	3	3	11430
ss2_TE_221	LTR/Gypsy	813	1	1	813
ss2_TE_222	LTR/Gypsy	9956	8	6	28014
ss2_TE_223	LTR/Gypsy	5662	7	2	5839
ss2_TE_224	LTR/Gypsy	14753	15	8	26061
ss2_TE_225	LTR/Gypsy	417	3	3	1249
ss2_TE_226	LTR/Gypsy	5668	1	1	5667
ss2_TE_227	LTR/Gypsy	5688	2	1	5688
ss2_TE_228	LTR/Gypsy	6718	2	1	6718
ss2_TE_229	LTR/Gypsy	8007	2	1	907
ss2_TE_230	LTR/Gypsy	6696	2	2	7293
ss2_TE_231	LTR/Gypsy	7998	16	11	31997
ss2_TE_232	LTR/Gypsy	6651	4	3	13385
ss2_TE_233	LTR/Gypsy	8186	18	9	14124
ss2_TE_234	LTR/Gypsy	6709	4	4	10508
ss2_TE_235	LTR/Gypsy	9136	2	1	8281
ss2_TE_236	LTR/Gypsy	3302	4	1	2057
ss2_TE_237	LTR/Gypsy	9131	3	1	9131
ss2_TE_238	LTR/Gypsy	2001	4	4	7476
ss2_TE_239	LTR/Gypsy	6711	1	1	6711
ss2_TE_240	LTR/Gypsy	6720	5	3	7837
ss2_TE_241	LTR/Gypsy	8010	3	1	8010
ss2_TE_242	LTR/Gypsy	9136	7	1	9136
ss2_TE_243	LTR/Gypsy	6326	10	8	9097
ss2_TE_244	LTR/Gypsy	2778	1	1	2778
ss2_TE_245	LTR/Gypsy	8516	60	17	19813
ss2_TE_246	LTR/Gypsy	6684	1	1	6684
ss2_TE_247	LTR/Gypsy	6689	5	3	7277
ss2_TE_248	LTR/Gypsy	9944	6	6	18996
ss2_TE_249	LTR/Gypsy	543	1	1	543
ss2_TE_250	LTR/Gypsy	6699	2	2	10344
ss2_TE_251	LTR/Gypsy	8028	16	5	17472
ss2_TE_252	LTR/Gypsy	6697	1	1	6697
ss2_TE_253	LTR/Gypsy	6326	2	1	4302
ss2_TE_254	LTR/Gypsy	9670	5	3	29009
ss2_TE_255	LTR/Gypsy	9964	5	3	16467
ss2_TE_256	LTR/Gypsy	12925	26	10	22569
ss2_TE_257	LTR/Gypsy	834	1	1	834
ss2_TE_258	LTR/Gypsy	6682	1	1	6682
ss2_TE_259	LTR/Gypsy	6400	1	1	6400
ss2_TE_260	LTR/Gypsy	5563	3	1	5563
ss2_TE_261	LTR/Gypsy	6683	2	2	13357
ss2_TE_262	LTR/Gypsy	6684	1	1	6684
ss2_TE_263	LTR/Gypsy	3597	20	7	15501

## Sheet: TableS4
Table S4. Detected TE elements in P. pulmonarius ss5.
Element	Type	Size	Fragments	Repeats	Total Bp
ss5_TE_1	DNA/TcMar-Pogo	540	3	1	540
ss5_TE_2	DNA/PIF-Harbinger	682	13	3	1103
ss5_TE_3	DNA/TcMar-Ant1	981	3	1	981
ss5_TE_4	DNA/Maverick	7242	37	19	50020
ss5_TE_5	DNA/Maverick	1494	2	1	1494
ss5_TE_6	DNA/TcMar-Fot1	1342	1	1	1342
ss5_TE_7	DNA/TcMar-Fot1	1286	1	1	1286
ss5_TE_8	DNA/TcMar-Fot1	1757	1	1	1756
ss5_TE_9	DNA/TcMar-Fot1	1757	3	2	3514
ss5_TE_10	DNA/TcMar-Fot1	1190	2	1	1190
ss5_TE_11	DNA/Crypton-V	10198	54	51	316697
ss5_TE_12	DNA	1171	31	8	7238
ss5_TE_13	DNA	504	6	1	504
ss5_TE_14	DNA/hAT-Ac	786	4	1	786
ss5_TE_15	DNA/Dada	969	12	10	9340
ss5_TE_16	DNA/CMC-EnSpm	978	2	2	1186
ss5_TE_17	DNA/CMC-EnSpm	1692	8	1	1692
ss5_TE_18	DNA/CMC-EnSpm	912	37	19	6699
ss5_TE_19	DNA/CMC-EnSpm	2013	5	2	3994
ss5_TE_20	DNA/CMC-EnSpm	882	1	1	882
ss5_TE_21	DNA/CMC-EnSpm	612	1	1	612
ss5_TE_22	DNA/CMC-EnSpm	720	3	2	1440
ss5_TE_23	DNA/CMC-EnSpm	978	7	1	978
ss5_TE_24	DNA/CMC-EnSpm	3250	25	5	16250
ss5_TE_25	DNA/CMC-EnSpm	441	1	0	0
ss5_TE_26	DNA/CMC-EnSpm	9360	31	9	56429
ss5_TE_27	DNA/CMC-EnSpm	588	1	1	587
ss5_TE_28	DNA/CMC-EnSpm	1698	2	1	1698
ss5_TE_29	DNA/CMC-EnSpm	720	2	2	1440
ss5_TE_30	DNA/MULE-MuDR	685	26	3	1870
ss5_TE_31	DNA/RC	1477	10	6	8862
ss5_TE_32	DNA/RC	1407	1	1	1407
ss5_TE_33	DNA/RC	651	1	1	651
ss5_TE_34	DNA/RC	1565	3	1	1565
ss5_TE_35	DNA/RC	4155	1	0	0
ss5_TE_36	DNA/RC	4248	3	3	6931
ss5_TE_37	DNA/RC	4155	1	1	4155
ss5_TE_38	DNA/RC	4236	1	1	4236
ss5_TE_39	DNA/RC	933	1	1	933
ss5_TE_40	DNA/RC	3943	2	1	3943
ss5_TE_41	DNA/RC	1716	1	1	1716
ss5_TE_42	DNA/RC	4155	1	1	4152
ss5_TE_43	DNA/RC	634	3	2	973
ss5_TE_44	DNA/RC	720	3	1	720
ss5_TE_45	DNA/RC	4173	1	1	4173
ss5_TE_46	LINE/L1-Tx1	1614	14	1	1614
ss5_TE_47	LINE/L1-Tx1	4215	3	3	8792
ss5_TE_48	LINE/L1-Tx1	4305	2	2	4102
ss5_TE_49	LINE/L1-Tx1	4305	1	1	4305
ss5_TE_50	LINE/L1-Tx1	4305	1	1	4302
ss5_TE_51	LINE/L2	10755	101	93	184053
ss5_TE_52	LINE/L1	4210	1	1	4179
ss5_TE_53	LINE/L1	4504	17	9	15075
ss5_TE_54	LINE/L1	4210	1	1	4210
ss5_TE_55	LINE/I	828	1	0	0
ss5_TE_56	LINE/Tad1	2403	4	2	4713
ss5_TE_57	LINE/Tad1	1020	2	2	2040
ss5_TE_58	LINE/Tad1	2742	1	1	2742
ss5_TE_59	LINE/Tad1	1146	2	2	1169
ss5_TE_60	LINE/Tad1	3633	3	1	3633
ss5_TE_61	LINE/Tad1	3651	1	1	3651
ss5_TE_62	LINE/Tad1	3651	2	2	3827
ss5_TE_63	LINE/Tad1	954	2	1	954
ss5_TE_64	LINE/Tad1	3666	3	2	6076
ss5_TE_65	LTR/Copia	5898	17	16	32423
ss5_TE_66	LTR/Copia	6152	7	7	8724
ss5_TE_67	LTR/Copia	5434	6	3	6729
ss5_TE_68	LTR/Copia	10472	71	30	19314
ss5_TE_69	LTR/Copia	5896	4	4	7210
ss5_TE_70	LTR/Copia	2538	2	1	2538
ss5_TE_71	LTR/Copia	6614	1	1	6614
ss5_TE_72	LTR/Copia	1107	1	1	494
ss5_TE_73	LTR/Copia	4499	3	2	7843
ss5_TE_74	LTR/Copia	1370	1	1	1370
ss5_TE_75	LTR/Copia	5854	4	4	9481
ss5_TE_76	LTR/Copia	816	1	1	816
ss5_TE_77	LTR/Copia	1201	28	6	7202
ss5_TE_78	LTR/Copia	6598	2	2	9354
ss5_TE_79	LTR/Copia	6818	1	1	6818
ss5_TE_80	LTR/Copia	4512	1	0	0
ss5_TE_81	LTR/Copia	10782	14	14	24116
ss5_TE_82	LTR/Copia	13774	71	3	14431
ss5_TE_83	LTR/Copia	666	16	7	3739
ss5_TE_84	LTR/Copia	2061	1	1	2061
ss5_TE_85	LTR/Copia	1487	4	4	2762
ss5_TE_86	LTR/Copia	14730	110	32	60878
ss5_TE_87	LTR/Copia	5898	2	2	9642
ss5_TE_88	LTR/Copia	6599	2	2	10443
ss5_TE_89	LTR/Copia	5534	5	5	10396
ss5_TE_90	LTR/Copia	5237	49	16	21967
ss5_TE_91	LTR/Copia	5032	1	1	5032
ss5_TE_92	LTR/Gypsy	6716	1	1	6716
ss5_TE_93	LTR/Gypsy	7100	2	2	7262
ss5_TE_94	LTR/Gypsy	9945	3	2	10102
ss5_TE_95	LTR/Gypsy	9950	8	4	32880
ss5_TE_96	LTR/Gypsy	6691	1	1	6691
ss5_TE_97	LTR/Gypsy	9758	3	1	9758
ss5_TE_98	LTR/Gypsy	5675	3	1	5675
ss5_TE_99	LTR/Gypsy	3430	38	15	18462
ss5_TE_100	LTR/Gypsy	1441	9	8	4011
ss5_TE_101	LTR/Gypsy	2889	4	3	6834
ss5_TE_102	LTR/Gypsy	9956	9	2	15164
ss5_TE_103	LTR/Gypsy	6693	1	1	6693
ss5_TE_104	LTR/Gypsy	6115	5	5	8555
ss5_TE_105	LTR/Gypsy	7956	8	6	21077
ss5_TE_106	LTR/Gypsy	8579	15	12	12030
ss5_TE_107	LTR/Gypsy	6804	1	1	6804
ss5_TE_108	LTR/Gypsy	9816	9	2	11623
ss5_TE_109	LTR/Gypsy	6710	1	1	6710
ss5_TE_110	LTR/Gypsy	6055	1	1	6055
ss5_TE_111	LTR/Gypsy	9137	2	1	7550
ss5_TE_112	LTR/Gypsy	6700	4	2	7168
ss5_TE_113	LTR/Gypsy	6711	2	1	6711
ss5_TE_114	LTR/Gypsy	5654	3	2	5829
ss5_TE_115	LTR/Gypsy	6711	2	2	7317
ss5_TE_116	LTR/Gypsy	6711	1	1	6711
ss5_TE_117	LTR/Gypsy	8332	1	1	8332
ss5_TE_118	LTR/Gypsy	2889	2	2	5778
ss5_TE_119	LTR/Gypsy	6722	1	1	6722
ss5_TE_120	LTR/Gypsy	4912	21	7	10296
ss5_TE_121	LTR/Gypsy	6056	1	1	6056
ss5_TE_122	LTR/Gypsy	2412	1	1	2412
ss5_TE_123	LTR/Gypsy	1892	1	0	0
ss5_TE_124	LTR/Gypsy	6711	2	2	7314
ss5_TE_125	LTR/Gypsy	6725	1	1	6725
ss5_TE_126	LTR/Gypsy	6699	4	4	13583
ss5_TE_127	LTR/Gypsy	13470	5	4	38246
ss5_TE_128	LTR/Gypsy	6690	3	2	7286
ss5_TE_129	LTR/Gypsy	4525	21	11	3958
ss5_TE_130	LTR/Gypsy	5162	19	8	31798
ss5_TE_131	LTR/Gypsy	7972	5	5	12732
ss5_TE_132	LTR/Gypsy	10312	36	19	31400
ss5_TE_133	LTR/Gypsy	2823	5	2	5680
ss5_TE_134	LTR/Gypsy	5696	1	1	5696
ss5_TE_135	LTR/Gypsy	4525	2	2	6140
ss5_TE_136	LTR/Gypsy	6696	2	2	7293
ss5_TE_137	LTR/Gypsy	8335	2	2	8587
ss5_TE_138	LTR/Gypsy	6704	2	2	7310
ss5_TE_139	LTR/Gypsy	7760	12	6	12327
ss5_TE_140	LTR/Gypsy	5950	25	18	16901
ss5_TE_141	LTR/Gypsy	2472	3	1	6129
ss5_TE_142	LTR/Gypsy	6675	2	2	7169
ss5_TE_143	LTR/Gypsy	834	1	1	834
ss5_TE_144	LTR/Gypsy	6698	2	2	13396
ss5_TE_145	LTR/Gypsy	6699	4	4	8507
ss5_TE_146	LTR/Gypsy	6684	1	1	6684
ss5_TE_147	LTR/Gypsy	5697	4	4	7032
ss5_TE_148	LTR/Gypsy	9137	6	1	9137
ss5_TE_149	LTR/Gypsy	6683	1	1	6683
ss5_TE_150	LTR/Gypsy	6690	3	2	7295
ss5_TE_151	LTR/Gypsy	7998	14	9	26489
ss5_TE_152	LTR/Gypsy	684	9	7	978
ss5_TE_153	LTR/Gypsy	8011	4	2	9924
ss5_TE_154	LTR/Gypsy	6709	1	1	6709
ss5_TE_155	LTR/Gypsy	9904	5	1	9904
ss5_TE_156	LTR/Gypsy	1546	4	1	1743
ss5_TE_157	LTR/Gypsy	4525	3	1	3066
ss5_TE_158	LTR/Gypsy	6714	2	2	7720
ss5_TE_159	LTR/Gypsy	6710	4	2	7314
ss5_TE_160	LTR/Gypsy	6683	1	1	6683
ss5_TE_161	LTR/Gypsy	1473	1	1	1473
ss5_TE_162	LTR/Gypsy	6326	20	16	12348
ss5_TE_163	LTR/Gypsy	3270	8	8	1836
ss5_TE_164	LTR/Gypsy	6743	3	2	8092
ss5_TE_165	LTR/Gypsy	6695	3	3	20068
ss5_TE_166	LTR/Gypsy	6673	1	1	6673
ss5_TE_167	LTR/Gypsy	8727	61	28	19383
ss5_TE_168	LTR/Gypsy	3057	1	0	0
ss5_TE_169	LTR/Gypsy	7918	38	4	11484
ss5_TE_170	LTR/Gypsy	9945	3	3	17637
ss5_TE_171	LTR/Gypsy	6400	3	2	6997
ss5_TE_172	LTR/Gypsy	6698	2	2	7294
ss5_TE_173	LTR/Gypsy	6710	2	2	13421
ss5_TE_174	LTR/Gypsy	6691	1	1	6691
ss5_TE_175	LTR/Gypsy	5593	11	1	5593
ss5_TE_176	LTR/Gypsy	6708	4	4	7992
ss5_TE_177	LTR/Gypsy	1371	1	1	1371
ss5_TE_178	LTR/Gypsy	5563	3	1	5563
ss5_TE_179	LTR/Gypsy	577	1	0	0
ss5_TE_180	LTR/Gypsy	2111	1	1	1804
ss5_TE_181	LTR/Gypsy	7928	17	5	10582
ss5_TE_182	LTR/Gypsy	1491	4	3	2295
ss5_TE_183	LTR/Gypsy	5722	7	1	5722
ss5_TE_184	LTR/Gypsy	7034	1	1	7034
ss5_TE_185	LTR/Gypsy	6709	1	1	6709
ss5_TE_186	LTR/Gypsy	2114	3	3	3329
ss5_TE_187	LTR/Gypsy	6689	4	2	6792
ss5_TE_188	LTR/Gypsy	6709	2	2	12972
ss5_TE_189	LTR/Gypsy	9623	18	14	26502
ss5_TE_190	LTR/Gypsy	6694	2	2	7301
ss5_TE_191	LTR/Gypsy	471	3	3	1413
ss5_TE_192	LTR/Gypsy	5669	7	2	8969
ss5_TE_193	LTR/Gypsy	9083	11	2	18165
ss5_TE_194	LTR/Gypsy	720	2	1	1292
ss5_TE_195	LTR/Gypsy	8826	1	1	8826
ss5_TE_196	LTR/Gypsy	10642	173	71	32257
ss5_TE_197	LTR/Gypsy	9966	14	9	27568
ss5_TE_198	LTR/Gypsy	5722	1	1	3772
ss5_TE_199	LTR/Gypsy	8054	23	13	18550
ss5_TE_200	LTR/Gypsy	9952	11	4	28428
ss5_TE_201	LTR/Gypsy	8018	6	1	8018
ss5_TE_202	LTR/Gypsy	8332	1	1	8332
ss5_TE_203	LTR/Gypsy	9945	3	2	10613
ss5_TE_204	LTR/Gypsy	2602	24	21	22424
ss5_TE_205	LTR/Gypsy	9945	2	1	5731
ss5_TE_206	LTR/Gypsy	5691	2	1	5691
ss5_TE_207	LTR/Gypsy	1176	2	2	2105
ss5_TE_208	LTR/Gypsy	7025	1	1	3190
ss5_TE_209	LTR/Gypsy	652	36	35	5406
ss5_TE_210	LTR/Gypsy	9940	5	5	13888
ss5_TE_211	LTR/Gypsy	10333	60	52	35339
ss5_TE_212	LTR/Gypsy	11015	37	21	46126
ss5_TE_213	LTR/Gypsy	7997	2	1	7997
ss5_TE_214	LTR/Gypsy	1932	1	1	1932
ss5_TE_215	LTR/Gypsy	4525	4	4	17787
ss5_TE_216	LTR/Gypsy	9083	3	1	8403
ss5_TE_217	LTR/Gypsy	9904	2	2	9931
ss5_TE_218	LTR/Gypsy	7025	8	8	11711
ss5_TE_219	LTR/Gypsy	6054	2	2	6336
ss5_TE_220	LTR/Gypsy	11015	20	1	2758
ss5_TE_221	LTR/Gypsy	8337	1	1	8337
ss5_TE_222	LTR/Gypsy	7982	14	8	24350
ss5_TE_223	LTR/Gypsy	9952	4	1	9096
ss5_TE_224	LTR/Gypsy	6703	2	2	6921
ss5_TE_225	LTR/Gypsy	6699	1	1	6699
ss5_TE_226	LTR/Gypsy	6938	13	13	19820
ss5_TE_227	LTR/Gypsy	6684	1	1	6684
ss5_TE_228	LTR/Gypsy	9945	2	1	9945
ss5_TE_229	LTR	543	18	18	6256
ss5_TE_230	LTR/Ngaro	4772	8	4	5357
ss5_TE_231	LTR/Ngaro	4635	3	2	8998
ss5_TE_232	LTR/Ngaro	4580	7	6	9957
ss5_TE_233	LTR/Ngaro	4757	12	7	11117
ss5_TE_234	LTR/Ngaro	4585	6	3	5235
ss5_TE_235	LTR/Ngaro	4781	10	5	9901
ss5_TE_236	LTR/Ngaro	4633	6	5	5559
ss5_TE_237	LTR/Ngaro	4619	8	4	5223
ss5_TE_238	LTR/Caulimovirus	3921	55	21	23920
ss5_TE_239	LTR/Pao	1158	12	4	4632

## Sheet: TableS5
Table S5. List of unique genes of ss2 (without homologs in ss5) clustered at the end of scaffold 10 together with their functional annotation.
GeneID	Feature	Contig	Start	Stop	Strand	Name	Product	BUSCO	PFAM	InterPro	EggNog	COG	GO Terms	Secreted	Membrane	Protease	CAZyme
EYR38_001978	CDS	scaffold_10	1103835	1106213	-		hypothetical protein								1 (o263-288i)
EYR38_001979	CDS	scaffold_10	1107957	1108888	+		hypothetical protein
EYR38_001980	CDS	scaffold_10	1113008	1114255	+	RNA14_1	mRNA 3'-end-processing protein rna14			IPR011990	ENOG410PHT3	A:(A) RNA processing and modification	GO:0005515
EYR38_001982	CDS	scaffold_10	1122465	1122978	+		hypothetical protein								2 (i12-32o78-99i)
EYR38_001983	CDS	scaffold_10	1125734	1126981	-	RNA14_2	mRNA 3'-end-processing protein rna14			IPR011990	ENOG410PHT3	A:(A) RNA processing and modification	GO:0005515
EYR38_001984	CDS	scaffold_10	1131254	1132032	-		hypothetical protein
EYR38_001985	CDS	scaffold_10	1137776	1141753	+		hypothetical protein		PF00076;PF00097;PF01485;PF13445	IPR000504;IPR000571;IPR002867;IPR012677;IPR013083;IPR027370;IPR031127;IPR035979	ENOG410QE9M	O:(O) Posttranslational modification, protein turnover, chaperones	GO:0003676;GO:0046872;GO:0004842;GO:0016567
EYR38_001986	CDS	scaffold_10	1142422	1144278	-		hypothetical protein		PF02182	IPR003105;IPR015947;IPR036987	ENOG410PNXU	O:(O) Posttranslational modification, protein turnover, chaperones
EYR38_001987	CDS	scaffold_10	1144843	1145476	-		hypothetical protein
EYR38_001988	CDS	scaffold_10	1148706	1150354	+		hypothetical protein				ENOG410Q3C5
EYR38_001989	CDS	scaffold_10	1153729	1154264	-		hypothetical protein		PF02229	IPR003173;IPR009044	ENOG410PPJA	K:(K) Transcription	GO:0003677;GO:0006355
EYR38_001991	CDS	scaffold_10	1160892	1168512	-		hypothetical protein				ENOG410Q3C5
EYR38_001993	CDS	scaffold_10	1177139	1177566	+		hypothetical protein
EYR38_001994	CDS	scaffold_10	1177809	1179457	-		hypothetical protein
EYR38_001995	CDS	scaffold_10	1180729	1181836	+		hypothetical protein
EYR38_001996	CDS	scaffold_10	1183043	1184441	-		hypothetical protein
EYR38_001997	CDS	scaffold_10	1191957	1193529	-		hypothetical protein				ENOG410PGBQ	J:(J) Translation, ribosomal structure and biogenesis
EYR38_001998	CDS	scaffold_10	1196397	1197523	-		hypothetical protein
EYR38_001999	CDS	scaffold_10	1209491	1209947	+		hypothetical protein			IPR008978
EYR38_002000	CDS	scaffold_10	1210742	1214615	-	RPB1_2	DNA-directed RNA polymerase II subunit rpb1		PF04983;PF05000	IPR000722;IPR006592;IPR007066;IPR007080;IPR007083;IPR038120	ENOG410PGUD	K:(K) Transcription	GO:0003899;GO:0003677;GO:0006351
EYR38_002002	CDS	scaffold_10	1238181	1240001	-		hypothetical protein			IPR036259	ENOG410QE36	P:(P) Inorganic ion transport and metabolism			4 (i27-47o59-77i98-120o126-146i)
EYR38_002003	CDS	scaffold_10	1242064	1245654	+		hypothetical protein
EYR38_002004	CDS	scaffold_10	1246275	1248984	+		hypothetical protein			IPR008978
EYR38_002005	CDS	scaffold_10	1255425	1256631	-		hypothetical protein		PF02229	IPR003173;IPR009044	ENOG410PPJA	K:(K) Transcription	GO:0003677;GO:0006355
EYR38_002006	CDS	scaffold_10	1261938	1262891	-		hypothetical protein
EYR38_002007	CDS	scaffold_10	1263140	1263458	+		hypothetical protein				ENOG410Q397
EYR38_002009	CDS	scaffold_10	1275850	1278326	+		hypothetical protein				ENOG410PZCM
EYR38_002010	CDS	scaffold_10	1280840	1281985	+		hypothetical protein			IPR000679;IPR013088			GO:0008270;GO:0043565;GO:0006355
EYR38_002011	CDS	scaffold_10	1287682	1288246	+		hypothetical protein
EYR38_002012	CDS	scaffold_10	1292935	1294349	-		hypothetical protein		PF12937	IPR001810;IPR032675;IPR036047			GO:0005515
EYR38_002013	CDS	scaffold_10	1300081	1300510	+		hypothetical protein
EYR38_002014	CDS	scaffold_10	1300753	1302410	-		hypothetical protein
EYR38_002015	CDS	scaffold_10	1303682	1304789	+		hypothetical protein
EYR38_002016	CDS	scaffold_10	1307273	1307802	-		hypothetical protein
EYR38_002017	CDS	scaffold_10	1318005	1320406	+		hypothetical protein
EYR38_002018	CDS	scaffold_10	1322954	1326513	-		hypothetical protein		PF00806	IPR001313;IPR011989;IPR016024;IPR033133;IPR033712	ENOG410PGBQ	J:(J) Translation, ribosomal structure and biogenesis	GO:0003723
EYR38_002019	CDS	scaffold_10	1334536	1335065	+		hypothetical protein
EYR38_002020	CDS	scaffold_10	1337838	1338646	-		hypothetical protein				ENOG410QDN9	S:(S) Function unknown
EYR38_002021	CDS	scaffold_10	1339918	1341575	+		hypothetical protein
EYR38_002022	CDS	scaffold_10	1341818	1342247	-		hypothetical protein
EYR38_002023	CDS	scaffold_10	1346887	1348419	-		hypothetical protein				ENOG410Q31C
EYR38_002024	CDS	scaffold_10	1350173	1350589	-		hypothetical protein
EYR38_002027	CDS	scaffold_10	1360659	1362284	-		hypothetical protein		PF01569	IPR000326;IPR036938	ENOG410PIVJ	I:(I) Lipid transport and metabolism			3 (o6-22i34-56o62-80i)
EYR38_002028	CDS	scaffold_10	1365448	1367177	-		hypothetical protein		PF00806	IPR001313;IPR011989;IPR016024;IPR033133	ENOG410PGBQ	J:(J) Translation, ribosomal structure and biogenesis	GO:0003723
EYR38_002029	CDS	scaffold_10	1370073	1371367	-		hypothetical protein
EYR38_002030	CDS	scaffold_10	1378379	1378691	-		hypothetical protein
EYR38_002031	CDS	scaffold_10	1381205	1381682	+		hypothetical protein								1 (o134-151i)
EYR38_002032	CDS	scaffold_10	1388951	1389874	+		hypothetical protein
EYR38_002033	CDS	scaffold_10	1392671	1394477	+		hypothetical protein		PF02373	IPR003347	ENOG410PQGE	K:(K) Transcription
EYR38_002034	CDS	scaffold_10	1398602	1401871	+		hypothetical protein			IPR011009	ENOG410PX8N				5 (i21-41o61-79i86-105o137-156i469-490o)
EYR38_002035	CDS	scaffold_10	1406602	1407709	+		hypothetical protein
EYR38_002036	CDS	scaffold_10	1408114	1410315	-		hypothetical protein
EYR38_002037	CDS	scaffold_10	1411157	1412805	-		hypothetical protein				ENOG410Q3C5
EYR38_002038	CDS	scaffold_10	1415746	1416693	+	TRP4_1	anthranilate phosphoribosyltransferase			IPR000312;IPR035902	ENOG410PH4I	E:(E) Amino acid transport and metabolism	GO:0016757
EYR38_002039	CDS	scaffold_10	1417257	1418629	+		hypothetical protein		PF02182	IPR003105;IPR015947;IPR036987	ENOG410PNXU	O:(O) Posttranslational modification, protein turnover, chaperones
EYR38_002042	CDS	scaffold_10	1437454	1438701	-	RNA14_3	mRNA 3'-end-processing protein rna14			IPR011990	ENOG410PHT3	A:(A) RNA processing and modification	GO:0005515
EYR38_002043	CDS	scaffold_10	1442509	1444857	-		hypothetical protein		PF00806	IPR001313;IPR011989;IPR016024;IPR033133	ENOG410PGBQ	J:(J) Translation, ribosomal structure and biogenesis	GO:0003723
EYR38_002044	CDS	scaffold_10	1452170	1453053	+		hypothetical protein
EYR38_002045	CDS	scaffold_10	1455832	1456640	-		hypothetical protein				ENOG410QDN9	S:(S) Function unknown
EYR38_002046	CDS	scaffold_10	1461371	1464608	-		hypothetical protein			IPR011009	ENOG410PX8N				5 (i21-41o61-79i86-116o157-176i489-510o)
EYR38_002047	CDS	scaffold_10	1468080	1468563	+		hypothetical protein
EYR38_002048	CDS	scaffold_10	1469152	1470958	-		hypothetical protein		PF02373	IPR003347	ENOG410PQGE	K:(K) Transcription
EYR38_002049	CDS	scaffold_10	1477955	1478432	-		hypothetical protein								1 (o134-151i)
EYR38_002050	CDS	scaffold_10	1480937	1481249	+		hypothetical protein
EYR38_002051	CDS	scaffold_10	1485966	1486430	+		hypothetical protein
EYR38_002052	CDS	scaffold_10	1487145	1487808	-		hypothetical protein			IPR014001;IPR027417	ENOG410Q0H1	A:(A) RNA processing and modification

## Sheet: TableS6
Table S6. List of unique genes of ss5 (without homologs in ss2) clustered at the beginning of scaffold 9 together with their functional annotation.
GeneID	Feature	Contig	Start	Stop	Strand	Name	Product	BUSCO	PFAM	InterPro	EggNog	COG	GO Terms	Secreted	Membrane	Protease	CAZyme
EYR40_010585	CDS	scaffold_9	51411	52401	-		hypothetical protein
EYR40_010586	CDS	scaffold_9	52779	54861	+		hypothetical protein
EYR40_010587	CDS	scaffold_9	56092	60927	+		hypothetical protein				ENOG410Q451				2 (o636-657i669-691o)
EYR40_010588	CDS	scaffold_9	67430	71655	-		hypothetical protein				ENOG410PXAI
EYR40_010589	CDS	scaffold_9	71979	73006	-	SNF1_3	Protein kinase			IPR011009;IPR028375;IPR032270	ENOG410PGMD	T:(T) Signal transduction mechanisms
EYR40_010590	CDS	scaffold_9	74043	74572	+		hypothetical protein
EYR40_010591	CDS	scaffold_9	93287	93985	-		hypothetical protein
EYR40_010592	CDS	scaffold_9	94109	94337	-		hypothetical protein				ENOG410PZDD
EYR40_010593	CDS	scaffold_9	94368	95105	-		hypothetical protein				ENOG410PZDD
EYR40_010594	CDS	scaffold_9	96664	97857	-		hypothetical protein				ENOG410PZDD
EYR40_010595	CDS	scaffold_9	103532	103877	-		hypothetical protein
EYR40_010596	CDS	scaffold_9	113820	114132	+		hypothetical protein
EYR40_010597	CDS	scaffold_9	118832	121552	-		hypothetical protein		PF08238	IPR006597;IPR011990	ENOG410PGIR	M:(M) Cell wall/membrane/envelope biogenesis;O:(O) Posttranslational modification, protein turnover, chaperones;T:(T) Signal transduction mechanisms	GO:0005515
EYR40_010598	CDS	scaffold_9	121679	122055	+		hypothetical protein
EYR40_010599	CDS	scaffold_9	132718	133835	+		hypothetical protein
EYR40_010600	CDS	scaffold_9	136586	138155	-		hypothetical protein			IPR032675	ENOG410Q4H0				1 (o74-95i)
EYR40_010601	CDS	scaffold_9	138393	139375	-		hypothetical protein			IPR009057	ENOG410Q04Q	S:(S) Function unknown	GO:0003677
EYR40_010602	CDS	scaffold_9	140538	141817	-		hypothetical protein			IPR036265					1 (o12-32i)
EYR40_010603	CDS	scaffold_9	143393	144419	+		hypothetical protein							SignalP(1-22)
EYR40_010604	CDS	scaffold_9	144664	145722	-		hypothetical protein			IPR036265
EYR40_010605	CDS	scaffold_9	147650	148720	-		hypothetical protein
EYR40_010606	CDS	scaffold_9	149068	149755	-		hypothetical protein
EYR40_010607	CDS	scaffold_9	151383	154355	+	SDH3	cytochrome b subunit of succinate dehydrogenase, Sdh3p		PF01127	IPR000701;IPR011009;IPR034804	ENOG410PQYD	C:(C) Energy production and conversion	GO:0016020;GO:0016627
EYR40_010608	CDS	scaffold_9	155056	157041	-		hypothetical protein		PF00400;PF08154;PF12894	IPR001680;IPR012972;IPR015943;IPR017986;IPR019775;IPR020472;IPR036322	ENOG410PGEI	S:(S) Function unknown	GO:0005515
EYR40_010609	CDS	scaffold_9	158289	162324	+		hypothetical protein		PF00122;PF00689;PF00690;PF00702;PF13246	IPR001757;IPR004014;IPR006068;IPR008250;IPR018303;IPR023298;IPR023299;IPR036412	ENOG410PFD7	P:(P) Inorganic ion transport and metabolism	GO:0016021;GO:0000166		10 (i78-98o104-123i296-317o323-349i839-861o873-893i913- 943o963-984i1005-1028o1040-1058i)
EYR40_010610	CDS	scaffold_9	164135	165178	+		hypothetical protein			IPR036265
EYR40_010611	CDS	scaffold_9	166440	167509	+		hypothetical protein			IPR032675
EYR40_010612	CDS	scaffold_9	169512	170977	-		hypothetical protein		PF02586	IPR003738;IPR036590	ENOG410PK5Y	S:(S) Function unknown
EYR40_010613	CDS	scaffold_9	171479	172385	+	SEC61_2	translocon subunit		PF10559	IPR002208;IPR019561;IPR023201;IPR030659	ENOG410PFE7	O:(O) Posttranslational modification, protein turnover, chaperones	GO:0016020;GO:0015031		4 (i33-55o82-101i122-145o151-173i)
EYR40_010614	CDS	scaffold_9	176095	178769	-		hypothetical protein		PF00069;PF07714	IPR000719;IPR008271;IPR011009	ENOG41KOG0588	T:(T) Signal transduction mechanisms	GO:0005524;GO:0004672;GO:0006468
EYR40_010615	CDS	scaffold_9	179870	180153	+		hypothetical protein							SignalP(1-18)
EYR40_010616	CDS	scaffold_9	181154	184752	+		hypothetical protein		PF00651	IPR000210;IPR000938;IPR011333;IPR036859	ENOG410PMXM	S:(S) Function unknown	GO:0005515
EYR40_010617	CDS	scaffold_9	185125	185606	+		hypothetical protein								1 (n4-12c30/31o46-66i)
EYR40_010618	CDS	scaffold_9	185697	187650	-		hypothetical protein			IPR000719;IPR011009	ENOG410Q3EM		GO:0005524;GO:0004672;GO:0006468
EYR40_010619	CDS	scaffold_9	187746	189028	+		hypothetical protein
EYR40_010620	CDS	scaffold_9	189487	191970	-	WC1	blue light receptor		PF00989;PF08447;PF13426	IPR000014;IPR013655;IPR035965	ENOG410PJCC	T:(T) Signal transduction mechanisms	GO:0005515
EYR40_010621	CDS	scaffold_9	194039	195547	-	PMK1_1	MAP kinase Pmk1		PF00069;PF07714	IPR000719;IPR003527;IPR008271;IPR008352;IPR011009;IPR017441	ENOG410PFNJ	T:(T) Signal transduction mechanisms	GO:0005524;GO:0004707;GO:0004672;GO:0006468
EYR40_010622	CDS	scaffold_9	195901	196974	-		hypothetical protein			IPR036265
EYR40_010623	CDS	scaffold_9	198616	200572	+		hypothetical protein			IPR000719;IPR011009	ENOG410Q3EM		GO:0005524;GO:0004672;GO:0006468
EYR40_010625	CDS	scaffold_9	202398	203572	-		hypothetical protein		PF01161	IPR008914;IPR035810;IPR036610	ENOG410PTM2	S:(S) Function unknown		SignalP(1-22)		I51
EYR40_010626	CDS	scaffold_9	204926	205675	-		hypothetical protein		PF15370	IPR027921	ENOG410Q0J5
EYR40_010627	CDS	scaffold_9	205981	210006	+		hypothetical protein			IPR001269;IPR013785;IPR018517;IPR035587	ENOG410PH4P	J:(J) Translation, ribosomal structure and biogenesis	GO:0017150;GO:0050660;GO:0003824;GO:0055114;GO:0008033
EYR40_010628	CDS	scaffold_9	210827	211559	+		hypothetical protein							SignalP(1-21)	1 (n8-19c26/27o42-60i)
EYR40_010629	CDS	scaffold_9	211667	212553	-		hypothetical protein								2 (o33-53i74-91o)
EYR40_010630	CDS	scaffold_9	213638	214381	-		hypothetical protein							SignalP(1-22)	1 (n6-16c21/22o45-62i)
EYR40_010631	CDS	scaffold_9	215049	215780	-		hypothetical protein							SignalP(1-21)	1 (n8-19c24/25o40-61i)
EYR40_010635	CDS	scaffold_9	253936	254688	+		hypothetical protein		PF01627	IPR008207;IPR036641	ENOG410PQMZ	T:(T) Signal transduction mechanisms	GO:0000160
EYR40_010636	CDS	scaffold_9	255189	257788	-		hypothetical protein			IPR000571;IPR036855	ENOG410QDJY	O:(O) Posttranslational modification, protein turnover, chaperones	GO:0046872
EYR40_010637	CDS	scaffold_9	258211	261780	+		hypothetical protein	EOG092R0FP6	PF00575;PF01423;PF07541	IPR001163;IPR003029;IPR010920;IPR011488;IPR012340;IPR022967;IPR024054;IPR024055;IPR034102	ENOG410PJGU	J:(J) Translation, ribosomal structure and biogenesis	GO:0003723;GO:0003743;GO:0003676;GO:0000387
EYR40_010638	CDS	scaffold_9	262418	264860	-		hypothetical protein			IPR011009	ENOG410PJ8S	S:(S) Function unknown
EYR40_010639	CDS	scaffold_9	265075	267238	+		hypothetical protein		PF00067	IPR001128;IPR002401;IPR036396	ENOG410Q3CX	Q:(Q) Secondary metabolites biosynthesis, transport and catabolism	GO:0005506;GO:0016705;GO:0020037;GO:0055114	SignalP(1-21)
EYR40_010640	CDS	scaffold_9	268683	269850	-		hypothetical protein
EYR40_010641	CDS	scaffold_9	270801	275384	+		hypothetical protein		PF00225;PF16796	IPR001752;IPR019734;IPR019821;IPR026986;IPR027417;IPR027640;IPR036961	ENOG410PJ03	Z:(Z) Cytoskeleton	GO:0003777;GO:0005524;GO:0008017;GO:0005515;GO:0007018		2 (i854-873o893-912i)
EYR40_010642	CDS	scaffold_9	275683	276632	-		hypothetical protein				ENOG410Q3VV
EYR40_010643	CDS	scaffold_9	282272	283780	-		hypothetical protein			IPR032675
EYR40_010645	CDS	scaffold_9	286324	288730	-		hypothetical protein	EOG092R0849	PF03914	IPR005612;IPR016024;IPR027193	ENOG410PFB4	J:(J) Translation, ribosomal structure and biogenesis	GO:0042254		3 (o379-401i436-455o461-481i)
EYR40_010646	CDS	scaffold_9	291888	293920	+		hypothetical protein				ENOG410PY7I				3 (i130-150o162-182i216-232o)
EYR40_010647	CDS	scaffold_9	296216	297486	-	ARG3	ornithine carbamoyltransferase	EOG092R0DB4	PF00185;PF02729	IPR002292;IPR006130;IPR006131;IPR006132;IPR036901	ENOG410PH0Z	E:(E) Amino acid transport and metabolism	GO:0016743;GO:0016597;GO:0006520
EYR40_010648	CDS	scaffold_9	300812	303797	+		putative NRPS-like protein biosynthetic cluster		PF00501;PF00550;PF01073;PF01370;PF07993;PF13193	IPR000873;IPR009081;IPR010080;IPR013120;IPR020845;IPR025110;IPR036291;IPR036736	ENOG410PMH9	I:(I) Lipid transport and metabolism	GO:0003824
EYR40_010649	CDS	scaffold_9	303902	306478	+		hypothetical protein			IPR011009	ENOG410PJ8S	S:(S) Function unknown
EYR40_010650	CDS	scaffold_9	310247	318641	+		hypothetical protein		PF12937;PF16499	IPR001810;IPR002241;IPR013780;IPR013785;IPR017853;IPR032675	ENOG410PHXZ	G:(G) Carbohydrate transport and metabolism	GO:0004553;GO:0003824;GO:0005515;GO:0005975	SignalP(1-23)			GH27
EYR40_010651	CDS	scaffold_9	318902	320294	-	GPI8	glycosylphosphatidylinositol anchor biosynthesis	EOG092R0C35	PF01650	IPR001096;IPR028361	ENOG410PFK5	O:(O) Posttranslational modification, protein turnover, chaperones	GO:0042765;GO:0008233;GO:0003923;GO:0006508;GO:0016255	SignalP(1-21)	1 (n3-13c21/22o359-376i)	C13
EYR40_010652	CDS	scaffold_9	320430	321694	+		hypothetical protein	EOG092R0OCV	PF07818	IPR012479	ENOG410PT9H	K:(K) Transcription	GO:0006355
EYR40_010653	CDS	scaffold_9	322043	324490	-		hypothetical protein		PF16499	IPR002241;IPR013780;IPR013785;IPR017853	ENOG410PHXZ	G:(G) Carbohydrate transport and metabolism	GO:0004553;GO:0003824;GO:0005975	SignalP(1-23)			GH27
EYR40_010654	CDS	scaffold_9	325921	326498	-		hypothetical protein								4 (i12-34o54-83i95-120o126-147i)
EYR40_010655	CDS	scaffold_9	327716	336040	-		hypothetical protein		PF01794;PF08022;PF08030;PF16499	IPR002241;IPR013112;IPR013121;IPR013130;IPR013780;IPR013785;IPR017853;IPR017927;IPR017938;IPR039261	ENOG410PHXZ	G:(G) Carbohydrate transport and metabolism	GO:0004553;GO:0016491;GO:0003824;GO:0005975;GO:0055114		6 (o52-74i119-138o241-258i270-289o295-312i439-457o)		GH27
EYR40_010656	CDS	scaffold_9	337536	337920	-		hypothetical protein
EYR40_010657	CDS	scaffold_9	339331	340868	+		hypothetical protein
EYR40_010659	CDS	scaffold_9	342092	342836	-	STE50_2	Adaptor for signal transduction		PF00788	IPR000159	ENOG410PI5N	T:(T) Signal transduction mechanisms	GO:0007165
EYR40_010660	CDS	scaffold_9	343345	344425	-		hypothetical protein			IPR032675
EYR40_010661	CDS	scaffold_9	348542	353023	+	TUP1	proteinral transcription repressor		PF00400;PF01183;PF08581	IPR001680;IPR002053;IPR013890;IPR015943;IPR017853;IPR017986;IPR018077;IPR019775;IPR020472;IPR036322	ENOG410PFUA	D:(D) Cell cycle control, cell division, chromosome partitioning	GO:0005515;GO:0003796;GO:0016998;GO:0009253				GH25
EYR40_010662	CDS	scaffold_9	357946	359342	-		hypothetical protein		PF00226	IPR001623;IPR036869	ENOG410PRXI	O:(O) Posttranslational modification, protein turnover, chaperones
EYR40_010663	CDS	scaffold_9	359392	361627	+		hypothetical protein		PF00067	IPR001128;IPR002401;IPR017972;IPR036396	ENOG410PK87	Q:(Q) Secondary metabolites biosynthesis, transport and catabolism	GO:0005506;GO:0016705;GO:0020037;GO:0055114	SignalP(1-19)
EYR40_010664	CDS	scaffold_9	362295	363004	-	ADI1	1,2-dihydroxy-3-keto-5-methylthiopentene dioxygenase		PF03079;PF07883	IPR004313;IPR011051;IPR014710;IPR027496	ENOG410PMYY	E:(E) Amino acid transport and metabolism	GO:0010309;GO:0016491;GO:0055114;GO:0019509
EYR40_010665	CDS	scaffold_9	363412	368683	+		hypothetical protein		PF00106;PF08659;PF13561	IPR002347;IPR020904;IPR032675;IPR036291	ENOG410PHZV	Q:(Q) Secondary metabolites biosynthesis, transport and catabolism	GO:0016491
EYR40_010666	CDS	scaffold_9	372677	373484	+		hypothetical protein		PF07021;PF08241;PF08242;PF13489;PF13649;PF13847	IPR013216;IPR029063	ENOG410PN2Q	I:(I) Lipid transport and metabolism	GO:0008168
EYR40_010667	CDS	scaffold_9	373911	374632	-		hypothetical protein		PF12296	IPR021054				SignalP(1-19)
EYR40_010668	CDS	scaffold_9	375312	376383	-		hypothetical protein		PF12937	IPR001810;IPR032675			GO:0005515
EYR40_010669	CDS	scaffold_9	377393	380202	+	PRP43_3	DEAH-box ATP-dependent RNA helicase prp43		PF00270;PF00271;PF04408;PF07717;PF13245	IPR001650;IPR002464;IPR007502;IPR011545;IPR011709;IPR014001;IPR027417	ENOG410PGYC	A:(A) RNA processing and modification	GO:0004386;GO:0003676;GO:0005524
EYR40_010670	CDS	scaffold_9	380958	382041	+		hypothetical protein		PF12937	IPR001810;IPR032675			GO:0005515
EYR40_010671	CDS	scaffold_9	383466	384748	+		hypothetical protein		PF01183	IPR002053;IPR008270;IPR017853;IPR018077	ENOG410PNC1	M:(M) Cell wall/membrane/envelope biogenesis	GO:0003796;GO:0016998;GO:0009253	SignalP(1-38)			GH25
EYR40_010672	CDS	scaffold_9	385092	387263	+		hypothetical protein		PF00782	IPR000340;IPR000387;IPR020422;IPR024950;IPR029021	ENOG410PHFA	V:(V) Defense mechanisms	GO:0008138;GO:0016791;GO:0006470;GO:0016311
EYR40_010673	CDS	scaffold_9	387369	388258	-	RPC19	RNA polymerase subunit AC19		PF01193;PF13656	IPR008193;IPR009025;IPR033898;IPR036603	ENOG410PQX3	F:(F) Nucleotide transport and metabolism	GO:0046983;GO:0003899;GO:0003677;GO:0006351
EYR40_010674	CDS	scaffold_9	388929	389549	+		hypothetical protein				ENOG410Q40Z
EYR40_010675	CDS	scaffold_9	389776	390476	-	NNT1	nicotinamide n-methyltransferase		PF10294	IPR019410	ENOG410PNHF	S:(S) Function unknown
EYR40_010676	CDS	scaffold_9	390995	391571	+	HSP10	10 kDa heat shock protein		PF00166	IPR011032;IPR020818;IPR037124	ENOG410PPNQ	O:(O) Posttranslational modification, protein turnover, chaperones	GO:0005737;GO:0006457
EYR40_010677	CDS	scaffold_9	392886	397705	-		hypothetical protein		PF05729	IPR007111;IPR027417	ENOG410QE8B	F:(F) Nucleotide transport and metabolism
EYR40_010678	CDS	scaffold_9	398942	404100	+		hypothetical protein		PF12814	IPR000408;IPR001849;IPR024774	ENOG410PMDA	T:(T) Signal transduction mechanisms	GO:0005938;GO:0005543;GO:0005515;GO:0032065
EYR40_010679	CDS	scaffold_9	404341	407636	-	SFB3	COPII coat Sec23p-Sfb3p heterodimer component		PF04811;PF04815;PF08033	IPR006896;IPR006900;IPR012990;IPR029006;IPR036175;IPR036180;IPR036465	ENOG410PHK7	U:(U) Intracellular trafficking, secretion, and vesicular transport	GO:0030127;GO:0006888;GO:0006886
EYR40_010680	CDS	scaffold_9	410417	411454	+		hypothetical protein		PF05018	IPR007714	ENOG410PTQ5	K:(K) Transcription
EYR40_010681	CDS	scaffold_9	414926	416277	+		hypothetical protein
EYR40_010682	CDS	scaffold_9	419816	421819	+	PDE2	3',5'-cyclic-nucleotide phosphodiesterase		PF00233	IPR002073;IPR003607;IPR023088;IPR023174;IPR036971	ENOG410PI3P	T:(T) Signal transduction mechanisms	GO:0008081;GO:0004114;GO:0007165
EYR40_010683	CDS	scaffold_9	422476	423397	-		hypothetical protein
EYR40_010684	CDS	scaffold_9	423663	425199	+		hypothetical protein		PF13640	IPR005123	ENOG410PPSP		GO:0016491;GO:0055114
EYR40_010685	CDS	scaffold_9	425775	428371	-	GFA1	glutamine--fructose-6-phosphate transaminase (isomerizing)		PF01380;PF13522;PF13537	IPR001347;IPR005855;IPR017932;IPR029055;IPR035466;IPR035490	ENOG410PG0E	M:(M) Cell wall/membrane/envelope biogenesis	GO:0004360;GO:0097367;GO:1901137;GO:1901135			C44
EYR40_010686	CDS	scaffold_9	429371	430532	-		hypothetical protein		PF12146;PF12697	IPR000073;IPR000639;IPR029058	ENOG4108I4H	S:(S) Function unknown	GO:0003824			S33
EYR40_010687	CDS	scaffold_9	432925	435191	+		hypothetical protein			IPR021476	ENOG410PR4W			SignalP(1-22)
EYR40_010688	CDS	scaffold_9	435864	436815	-		hypothetical protein				ENOG410PR4W			SignalP(1-22)
EYR40_010689	CDS	scaffold_9	437796	440353	-		hypothetical protein		PF00067	IPR001128;IPR002401;IPR036396	ENOG4112P50	Q:(Q) Secondary metabolites biosynthesis, transport and catabolism	GO:0005506;GO:0020037;GO:0016705;GO:0055114
EYR40_010690	CDS	scaffold_9	441316	442841	+		hypothetical protein				ENOG410PY7U				7 (o20-40i61-80o86-106i118-139o159-183i209-232o238-259i)
EYR40_010691	CDS	scaffold_9	443214	444455	+		hypothetical protein		PF01764	IPR002921;IPR029058	ENOG410Q3BZ	S:(S) Function unknown	GO:0006629
EYR40_010692	CDS	scaffold_9	447229	448886	+		hypothetical protein				ENOG410PY7U				7 (o15-33i54-74o86-104i116-138o158-181i202-219o225-244i)
EYR40_010693	CDS	scaffold_9	449128	449407	-		hypothetical protein
EYR40_010694	CDS	scaffold_9	453692	454997	+		hypothetical protein		PF00484	IPR001765;IPR036874	ENOG410PNV3	P:(P) Inorganic ion transport and metabolism	GO:0008270;GO:0004089	SignalP(1-18)
EYR40_010695	CDS	scaffold_9	455248	456565	-		hypothetical protein		PF00775;PF04444	IPR000627;IPR007535;IPR015889	ENOG410PFEK	Q:(Q) Secondary metabolites biosynthesis, transport and catabolism	GO:0018576;GO:0005506;GO:0016702;GO:0008199;GO:0003824;GO:0009712;GO:0055114;GO:0006725
EYR40_010696	CDS	scaffold_9	457123	462397	+	MSH6	DNA mismatch repair protein msh6		PF00488;PF01624;PF05192	IPR000432;IPR007695;IPR007696;IPR015536;IPR016151;IPR017261;IPR027417;IPR036187;IPR036678	ENOG410PH6E	L:(L) Replication, recombination and repair	GO:0030983;GO:0005524;GO:0006298
EYR40_010697	CDS	scaffold_9	462836	464943	+		hypothetical protein		PF00722	IPR000757;IPR013320	ENOG410PH2Y	G:(G) Carbohydrate transport and metabolism	GO:0004553;GO:0005975	SignalP(1-21)			GH16
EYR40_010698	CDS	scaffold_9	487586	488502	-	FAU1	5,10-methenyltetrahydrofolate synthetase		PF01812	IPR002698;IPR024185;IPR037171	ENOG410PQP3	H:(H) Coenzyme transport and metabolism
EYR40_010699	CDS	scaffold_9	488896	496423	+		hypothetical protein			IPR016024	ENOG410PVAI	S:(S) Function unknown			3 (o1363-1383i1434-1452o2034-2052i)
EYR40_010700	CDS	scaffold_9	496768	499234	+		hypothetical protein				ENOG410QD8U	T:(T) Signal transduction mechanisms
EYR40_010701	CDS	scaffold_9	500520	503078	+	EXO1	Rad2 nuclease		PF00752;PF00867	IPR006084;IPR006085;IPR006086;IPR008918;IPR019974;IPR029060;IPR032641;IPR036279;IPR037315	ENOG410PFQY	L:(L) Replication, recombination and repair	GO:0004518;GO:0003677;GO:0003824;GO:0035312;GO:0016788;GO:0006281
EYR40_010702	CDS	scaffold_9	504005	505427	+		hypothetical protein		PF00096;PF12874;PF13894	IPR013087;IPR036236	ENOG410PR0T	K:(K) Transcription	GO:0003676
EYR40_010703	CDS	scaffold_9	505719	506333	-		hypothetical protein		PF08510	IPR013717	ENOG410PNRM	G:(G) Carbohydrate transport and metabolism			2 (i41-63o83-105i)
EYR40_010704	CDS	scaffold_9	506670	507739	-		hypothetical protein		PF00561;PF12697	IPR000073;IPR029058	ENOG410PFHU	S:(S) Function unknown
EYR40_010705	CDS	scaffold_9	508287	510273	-		hypothetical protein		PF00076	IPR000504;IPR012677;IPR035979	ENOG410PSKH	S:(S) Function unknown	GO:0003676
EYR40_010706	CDS	scaffold_9	511433	515034	-		hypothetical protein				ENOG410Q31Z				4 (i287-306o360-381i412-433o453-480i)
EYR40_010707	CDS	scaffold_9	515456	522185	-		hypothetical protein		PF00551;PF02911;PF03098	IPR001128;IPR002376;IPR005793;IPR010255;IPR011034;IPR019791;IPR034807;IPR034812;IPR036396;IPR036477;IPR037120	ENOG410PGWA	Q:(Q) Secondary metabolites biosynthesis, transport and catabolism	GO:0016742;GO:0005506;GO:0020037;GO:0016705;GO:0016491;GO:0004601;GO:0003824;GO:0009058;GO:0055114;GO:0031408;GO:0006979
EYR40_010708	CDS	scaffold_9	523367	525578	+		hypothetical protein		PF09994	IPR018712	ENOG410PJGE	S:(S) Function unknown
EYR40_010709	CDS	scaffold_9	525763	528051	+		hypothetical protein		PF00326;PF01738;PF07676;PF07859	IPR001375;IPR011042;IPR011659;IPR029058	ENOG410PWA7	O:(O) Posttranslational modification, protein turnover, chaperones	GO:0008236;GO:0006508			S09C	CE10
EYR40_010710	CDS	scaffold_9	528154	529850	-		hypothetical protein				ENOG410Q4E0
EYR40_010711	CDS	scaffold_9	530227	536313	-	ERG6	Delta(24)-sterol C-methyltransferase		PF01209;PF02353;PF08241;PF08242;PF08498;PF11901;PF13489;PF13649;PF13847	IPR013705;IPR024518;IPR025714;IPR029063;IPR030384	ENOG410PH10	H:(H) Coenzyme transport and metabolism	GO:0008168;GO:0006694
EYR40_010712	CDS	scaffold_9	536571	537219	-	RAD52	DNA repair protein rad52		PF04098	IPR007232	ENOG410PHXY	L:(L) Replication, recombination and repair	GO:0006310;GO:0006281
EYR40_010713	CDS	scaffold_9	537816	540452	+		hypothetical protein		PF00076	IPR000504;IPR002004;IPR012677;IPR035979;IPR036053	ENOG410PPVT	A:(A) RNA processing and modification;J:(J) Translation, ribosomal structure and biogenesis	GO:0003676;GO:0003723
EYR40_010714	CDS	scaffold_9	541523	543514	-	ALD5_3	aldehyde dehydrogenase (NAD(P)(+)) ald5			IPR015590;IPR016161;IPR016162;IPR016163;IPR029510	ENOG410PFKN	C:(C) Energy production and conversion	GO:0016491;GO:0016620;GO:0055114
EYR40_010715	CDS	scaffold_9	545285	546705	-		hypothetical protein		PF00840	IPR001722;IPR013320;IPR037019	ENOG410IE3Y	G:(G) Carbohydrate transport and metabolism	GO:0004553;GO:0005975	SignalP(1-18)			GH7
EYR40_010716	CDS	scaffold_9	547704	550103	+		hypothetical protein		PF00324;PF13520	IPR002293	ENOG410PFCI	E:(E) Amino acid transport and metabolism	GO:0016020;GO:0022857;GO:0055085		12 (i42-64o70-95i116-144o164-186i198-216o254-273i294-315o321- 337i344-363o416-443i496-513o533-552i)
EYR40_010717	CDS	scaffold_9	550782	557537	+		hypothetical protein		PF07690	IPR011701;IPR020846;IPR036259	ENOG410PJ5U	G:(G) Carbohydrate transport and metabolism	GO:0016021;GO:0055085		11 (i47-65o85-107i114-130o136-159i171-191o239-260i272- 292o304-324i331-353o365-384i396-417o)
EYR40_010718	CDS	scaffold_9	558242	560049	-		hypothetical protein		PF00190;PF07883	IPR006045;IPR011051;IPR014710;IPR017774	ENOG410PHMM	G:(G) Carbohydrate transport and metabolism	GO:0045735;GO:0033609	SignalP(1-20)
EYR40_010719	CDS	scaffold_9	566353	566996	+		hypothetical protein							SignalP(1-17)
EYR40_010720	CDS	scaffold_9	567327	569885	-	AIP1	WD40 repeat-like protein		PF00400;PF12894	IPR001680;IPR011047;IPR015943;IPR017986;IPR019775;IPR020472;IPR024977	ENOG410PI4U	Z:(Z) Cytoskeleton	GO:0005515
EYR40_010721	CDS	scaffold_9	570277	570846	+		hypothetical protein		PF00011	IPR002068;IPR008978	ENOG410PT32	O:(O) Posttranslational modification, protein turnover, chaperones
EYR40_010722	CDS	scaffold_9	571122	573308	-		hypothetical protein		PF07690	IPR011701;IPR020846;IPR036259	ENOG410PJ5U	G:(G) Carbohydrate transport and metabolism	GO:0016021;GO:0055085		10 (i41-59o79-98i110-132o187-208i220-238o286-311i323-342o348- 367i379-400o412-432i)
EYR40_010723	CDS	scaffold_9	573693	575208	+	MAD3	Mitotic spindle checkpoint component mad3		PF08311	IPR013212;IPR015661	ENOG410QDQK	D:(D) Cell cycle control, cell division, chromosome partitioning	GO:0007094
EYR40_010724	CDS	scaffold_9	575475	576575	+		hypothetical protein		PF00076;PF13865	IPR000504;IPR012677;IPR025715;IPR035979	ENOG410PS9N	A:(A) RNA processing and modification	GO:0003676
EYR40_010725	CDS	scaffold_9	577954	579295	-		hypothetical protein	EOG092R0GKM		IPR007085;IPR035929	ENOG410PGAA	H:(H) Coenzyme transport and metabolism
EYR40_010726	CDS	scaffold_9	579903	580790	+	RAS2_3	Ras GTPase ras2		PF00071	IPR001806;IPR020849;IPR027417	ENOG410PM57	S:(S) Function unknown	GO:0016020;GO:0005525;GO:0003924;GO:0007165
EYR40_010727	CDS	scaffold_9	582805	585183	-		hypothetical protein			IPR012340	ENOG410Q3CK
EYR40_010728	CDS	scaffold_9	586090	587213	+		hypothetical protein							SignalP(1-34)
EYR40_010729	CDS	scaffold_9	587425	588215	+		hypothetical protein		PF03070	IPR004305;IPR016084	ENOG410PRT8	K:(K) Transcription
EYR40_010730	CDS	scaffold_9	588279	590372	-		hypothetical protein		PF13450	IPR036188	ENOG410PFK2	S:(S) Function unknown
EYR40_010732	CDS	scaffold_9	592747	594911	-		hypothetical protein		PF00069;PF07714	IPR000719;IPR001245;IPR008266;IPR011009	ENOG410Q491	T:(T) Signal transduction mechanisms	GO:0004672;GO:0005524;GO:0006468
EYR40_010733	CDS	scaffold_9	595100	596732	+		hypothetical protein			IPR000719;IPR008271;IPR011009;IPR036537	ENOG410Q4AE	T:(T) Signal transduction mechanisms	GO:0005524;GO:0004672;GO:0006468;GO:0007166
EYR40_010734	CDS	scaffold_9	597468	598618	-		hypothetical protein				ENOG410Q433
EYR40_010735	CDS	scaffold_9	599147	604104	+	ATG11	oligomeric, coiled-coil, peripheral membrane protein	EOG092R01J5	PF10377	IPR019460;IPR040040	ENOG410PJTE	U:(U) Intracellular trafficking, secretion, and vesicular transport	GO:0000422;GO:0000045
EYR40_010736	CDS	scaffold_9	605144	607197	+		hypothetical protein		PF00083;PF07690	IPR003663;IPR005828;IPR005829;IPR020846;IPR036259	ENOG410PJ7Z	G:(G) Carbohydrate transport and metabolism	GO:0016021;GO:0016020;GO:0022857;GO:0005215;GO:0055085		12 (i31-50o70-93i105-123o135-159i171-189o195-216i288-308o320- 340i352-377o383-411i423-440o452-471i)
EYR40_010737	CDS	scaffold_9	608046	609289	-	PP1	Serine/threonine-protein phosphatase pp1		PF00149;PF16891	IPR004843;IPR006186;IPR029052;IPR031675;IPR037981	ENOG410QDCN	T:(T) Signal transduction mechanisms	GO:0000164;GO:0016787;GO:0004722
EYR40_010738	CDS	scaffold_9	610183	613745	-		hypothetical protein	EOG092R0H4U		IPR011993	ENOG410PGP2	S:(S) Function unknown
EYR40_010739	CDS	scaffold_9	614264	618034	+		hypothetical protein		PF06428	IPR009449	ENOG410Q11J	U:(U) Intracellular trafficking, secretion, and vesicular transport
EYR40_010740	CDS	scaffold_9	619309	621089	+	VPL2_3	Versatile peroxidase vpl2		PF00141;PF11895	IPR001621;IPR002016;IPR010255;IPR019793;IPR019794;IPR024589	ENOG410PMVS	Q:(Q) Secondary metabolites biosynthesis, transport and catabolism	GO:0020037;GO:0004601;GO:0055114;GO:0006979	SignalP(1-18)			AA2
EYR40_010741	CDS	scaffold_9	622108	622863	+		hypothetical protein
EYR40_010742	CDS	scaffold_9	623032	625085	-		hypothetical protein				ENOG410Q42E	S:(S) Function unknown			1 (o445-468i)
EYR40_010743	CDS	scaffold_9	626090	626747	-	MRPL25	54S ribosomal protein L25, mitochondrial			IPR037507	ENOG410PNTI	J:(J) Translation, ribosomal structure and biogenesis	GO:0005762;GO:0003735
EYR40_010744	CDS	scaffold_9	627245	628945	+		hypothetical protein		PF10375	IPR000237;IPR019459	ENOG410PH5H	U:(U) Intracellular trafficking, secretion, and vesicular transport
EYR40_010745	CDS	scaffold_9	629138	629721	-	HTA1_2	histone H2A		PF00125;PF00808;PF16211	IPR002119;IPR007125;IPR009072;IPR032454;IPR032458	ENOG410PNTK	B:(B) Chromatin structure and dynamics	GO:0000786;GO:0005634;GO:0003677;GO:0046982
EYR40_010747	CDS	scaffold_9	631470	633358	+		hypothetical protein		PF00069;PF07714	IPR000719;IPR008266;IPR011009	ENOG410Q491	T:(T) Signal transduction mechanisms	GO:0005524;GO:0004672;GO:0006468
EYR40_010748	CDS	scaffold_9	633664	638926	-	RAM2	CAAX geranylgeranyltransferase alpha subunit		PF00069;PF00076;PF01239;PF07714	IPR000504;IPR000719;IPR001245;IPR002088;IPR008266;IPR011009;IPR012677;IPR035979	ENOG410PGF8	O:(O) Posttranslational modification, protein turnover, chaperones	GO:0003676;GO:0008318;GO:0004672;GO:0005524;GO:0018342;GO:0006468
EYR40_010749	CDS	scaffold_9	639416	640274	-		hypothetical protein		PF11705	IPR024661	ENOG410PTJG	F:(F) Nucleotide transport and metabolism	GO:0003899;GO:0006383
EYR40_010750	CDS	scaffold_9	645730	647390	-		hypothetical protein			IPR036047	ENOG410Q3M6		GO:0005515
EYR40_010760	CDS	scaffold_9	682992	684591	+		hypothetical protein		PF07470	IPR008928;IPR010905;IPR012341	ENOG410PJH2	S:(S) Function unknown	GO:0003824	SignalP(1-20)			GH105
